# Supplementary material for: Using collision-induced dissociation to constrain sensitivity of ammonia chemical ionization mass spectrometry (NH 4 + -CIMS) tooxygenated volatile organic compounds
Source: Copernicus journal article supplement (doi:10.5194/amt-2018-425), 2018-12-12
Supplement: Supplementary file 1 [file amt-2018-425-supplement.pdf]

# Supporting Information to “Using collision-induced dissociation to constrain sensitivity of ammonia chemical ionization mass spectrometry (NH<sub>4</sub><sup>+</sup>-CIMS) to oxygenated volatile organic compounds”

- 5 Alexander Zaytsev<sup>1</sup>, Martin Breitenlechner<sup>1</sup>, Abigail R. Koss<sup>2</sup>, Christopher Y. Lim<sup>2</sup>, James C. Rowe<sup>2</sup>, Jesse H. Kroll<sup>2</sup>, and Frank N. Keutsch<sup>1,3,4</sup>

<sup>1</sup>John A. Paulson School of Engineering and Applied Sciences, Harvard University, Cambridge, MA 02138, USA,

<sup>2</sup>Department of Civil and Environmental Engineering, Massachusetts Institute of Technology, Cambridge, MA 02139, USA,

<sup>3</sup>Department of Chemistry and Chemical Biology, Harvard University, Cambridge, MA 02138, USA,

- 10 <sup>4</sup>Department of Earth and Planetary Sciences, Harvard University, Cambridge, MA 02138, USA

*Correspondence to:* Alexander Zaytsev (zaytsev@g.harvard.edu)

## 1 Additional Figures

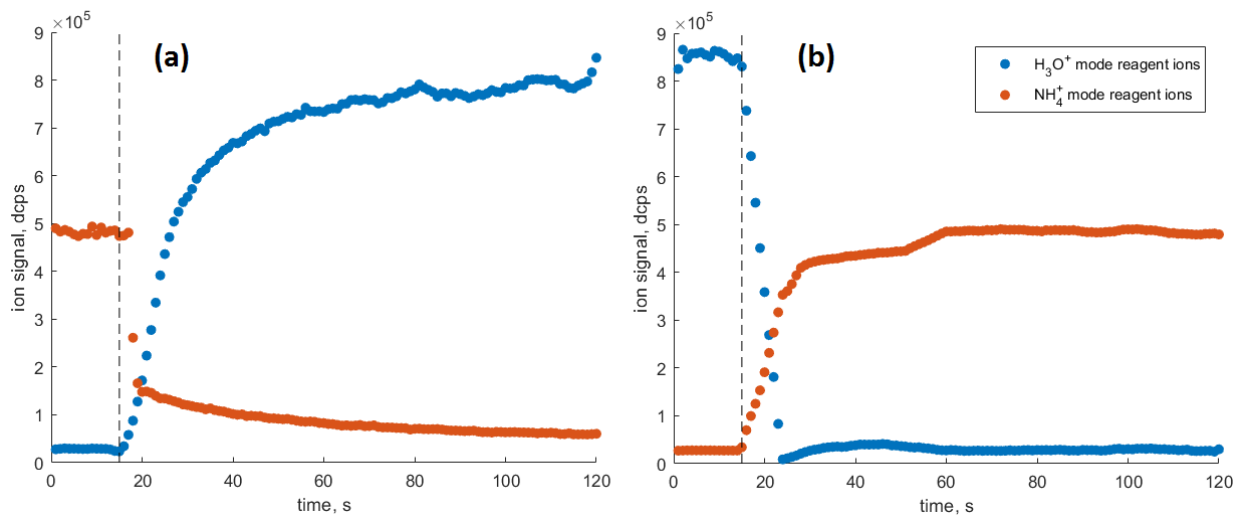

**Figure S1: Signals of reagent ions during switching between the two modes.  $\text{H}_3\text{O}^+$  mode reagent ions comprise  $\text{H}_3\text{O}^+(\text{H}_2\text{O})_n$ ,  $n=0,1$ ;  $\text{NH}_4^+$  mode reagent ions comprise  $\text{NH}_4^+(\text{H}_2\text{O})_n$ ,  $n=0,1,2$ . (a) Switching from the  $\text{NH}_4^+$  mode to the  $\text{H}_3\text{O}^+$  mode. Switching effectively occurs within two minutes. (b) Switching from the  $\text{H}_3\text{O}^+$  mode to the  $\text{NH}_4^+$  mode. Switching effectively occurs within one minute.**

5

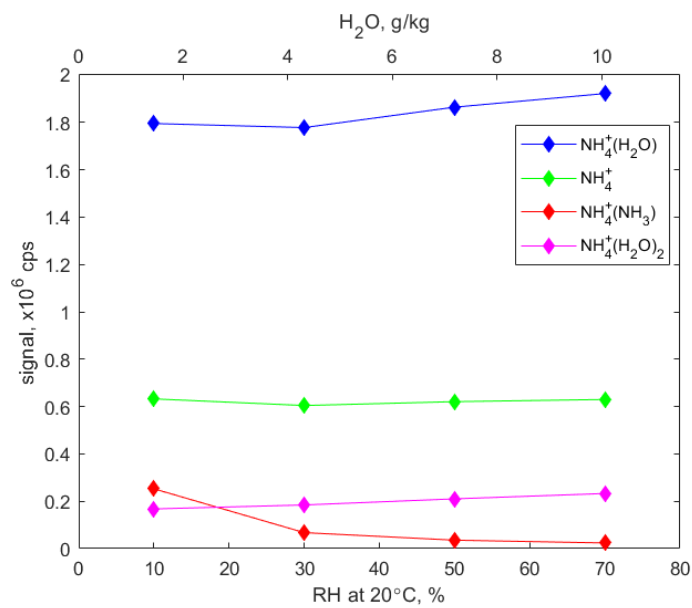

**Figure S2: Reagent ion signals as a function of water vapour mixing ratios of the sampled air.**

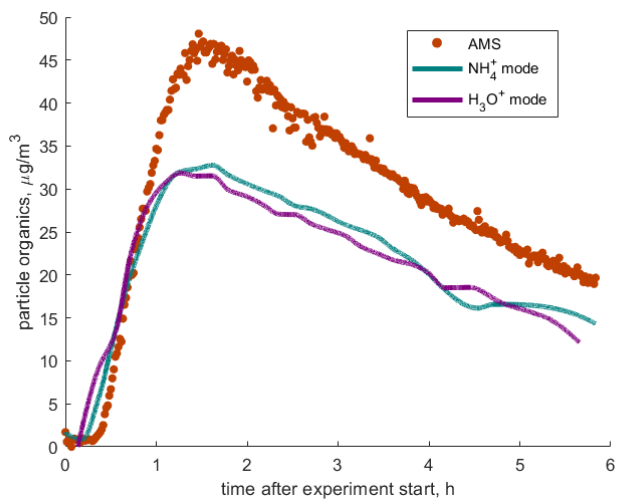

**Figure S3: SOA produced during photooxidation of 3-methylcatechol in a laboratory experiment. The total organic mass measured by AMS and the two modes of the CIMS instrument is presented.**
