# Supplementary material for: Using collision-induced dissociation to constrain sensitivity of ammonia chemical ionization mass spectrometry (NH 4 + -CIMS) tooxygenated volatile organic compounds
Source: Copernicus journal article supplement (doi:10.5194/amt-2018-425), 2018-12-12
Supplement: Supplementary file [file amt-2018-425-AC1-supplement.pdf]

## Response to reviewer #1's comments

We would like to thank the reviewer for the positive reception of our work and constructive comments that helped us to improve our manuscript. In this document we provide our replies to the reviewer's comments. Page and line numbers in the responses correspond to those in the AMTD paper.

1. **P5, L15-16.** *The authors stated that organic compounds with lower sensitivities under dry conditions exhibit a stronger humidity dependence and that higher molecular weight molecules show a weaker humidity dependence. It would be interesting to plot the sensitivity of calibrated compounds versus their molecular weight to check if there is a clear relationship between sensitivity and molecular weight. It is also interesting to check if there is a connection (relationship) between water dependence and  $V_{50}$  or  $KE_{cm\ 50}$  values for OVOCs.*

On average, heavier molecules are detected at the higher sensitivity, however the connection between the sensitivity of calibrated compounds and their molecular weights is relatively weak ( $R^2 = 0.35$ ) as shown in Fig. S5.

We include the following sentence to the manuscript (P5 L9):

“There is no strong correlation between the sensitivity to the calibrated compounds and their molecular weight ( $R^2 = 0.35$ , Fig. S5).”

We include the following figure in the Supporting Information (Fig. S5, SI P7):

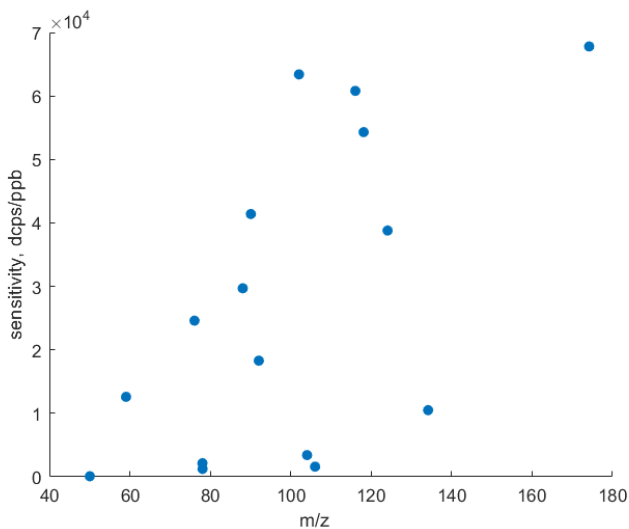

Figure S5: The relationship between the measured sensitivity for calibrated compounds and their molecular weight.

Similarly, more stable  $\text{NH}_4^+$ -VOC clusters (the ones that have higher  $KE_{cm\ 50}$ ) show slightly smaller sensitivity dependence on RH, but this connection is also relatively weak ( $R^2 = 0.29$ ) as shown in Fig. S6.

We modify the last two sentences of the section 3 of the manuscript (P5 L15):

“Generally, a stronger humidity dependence is observed for components with lower sensitivities at dry conditions. Higher molecular weight molecules have weaker humidity dependence. Humidity dependence of sensitivity does not show a strong correlation to cluster stability, as quantified by  $KE_{50\text{ cm}}$  ( $R^2 = 0.29$ , Fig. S6). In addition, correlation between humidity dependence of sensitivity and polarity of analyte molecules is relatively weak ( $R^2 = 0.31$ ).”

We include the following figure in the Supporting Information (Fig. S6, SI P8):

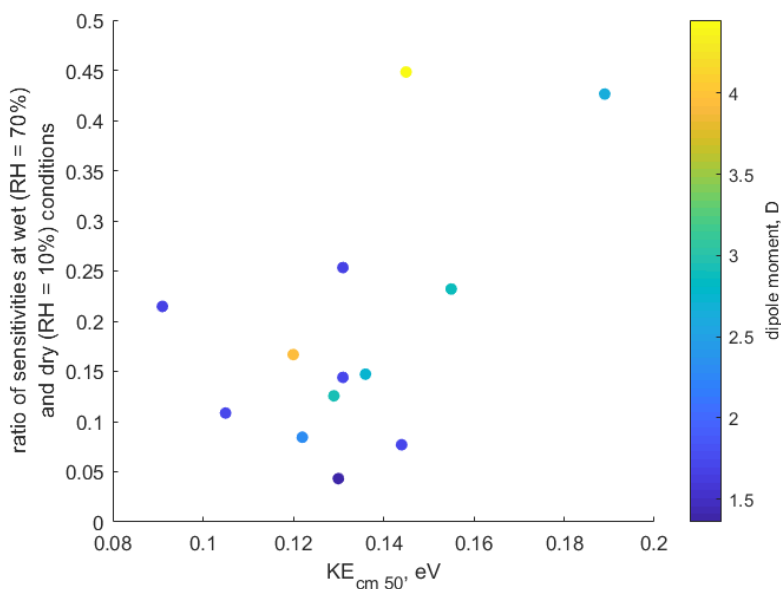

Figure S6: The relationship between the  $\text{NH}_4^+$ -CIMS sensitivity dependence on RH and  $KE_{\text{cm}50}$ . Data points are color-coded using the permanent dipole moment of the species.

2. ***P5, L18. Are there any evidence for protonated ions of organic molecules, especially for aerosol samples?***

There are several molecules that were observed as protonated ions as well as ammonia-organic clusters. Some of these molecules, detected in the particle phase, are shown in Fig. R3.

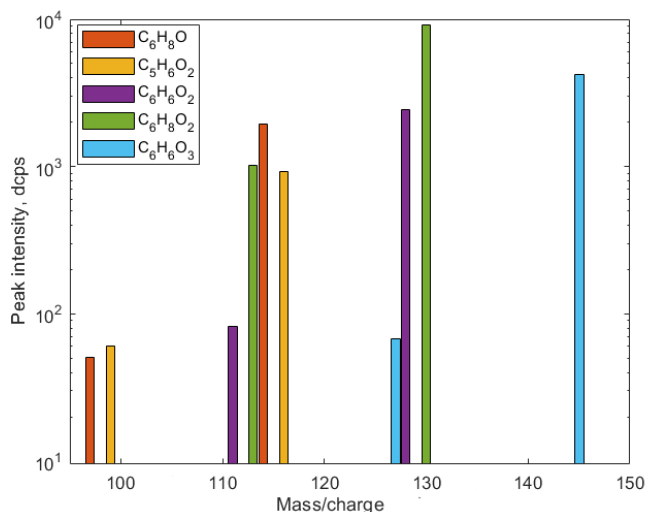

Figure R3: Peak intensities for molecules detected as ammonia-organic clusters as well as protonated ions.

This plot contains five molecules each of which was detected as a protonated ion (i.e.,  $C_6H_8O \cdot H^+$ ) and an ammonia-organic cluster (i.e.,  $C_6H_8O \cdot NH_4^+$ ).

We include the following discussion to the manuscript (P4 L29):

“Most organic molecules are detected as ammonium-organic clusters  $NH_4^+ \cdot VOC$  with a few exceptions for which protonated ions  $VOC \cdot H^+$  are also observed. The protonated ions could be produced through proton switching reaction either from  $H_3O^+ \cdot (H_2O)_n$  or  $NH_4^+$ . However, for all of these molecules the intensity of the ammonia-organic cluster is at least one order of magnitude higher than the intensity of the corresponding protonated ion.”

3. ***P6, L25-28. What are the RH conditions for the measurements presented in Fig. 4? Is the relationship between the  $KE_{cm\ 50}$  and sensitivity of calibrated compounds probed under varying RH conditions? Given that the sensitivity of  $NH_4^+$ -CIMS greatly depends on RH (Fig 2), the relationship between the  $KE_{cm\ 50}$  and sensitivity may also be RH dependent. This issue merits additional discussions in the manuscript, as it determines whether the relationship obtained at a certain RH can be applied to measurements performed at a different RH.***

We modify the following sentence by adding the RH conditions for the measurements presented in Fig. 4 (P6 L25):

“Fig. 4 shows the relationship between the calculated kinetic energy  $KE_{cm\ 50}$  and measured sensitivity for 16 calibrated compounds at 10% RH and 20 °C.”

We include the following discussion of the dependence of the relationship between  $KE_{cm\ 50}$  and sensitivity on RH (P7 L4):

“As shown in Fig. 2, the sensitivity of  $\text{NH}_4^+$ -CIMS to many calibrated compounds is RH dependent, thus we observe that the relationship between the calibrated kinetic energy  $\text{KE}_{\text{cm } 50}$  and the measured sensitivity also depends on the humidity of the sampled air (Fig. S7). Therefore, the values of the collisional limit and other calculated sensitivities reported herein are unique to the instrument setup (i.e., pressures and voltages in the reaction chamber) and vary with the humidity of the sampled air.”

We include the following figure in the Supporting Information (Fig. S7, SI P9):

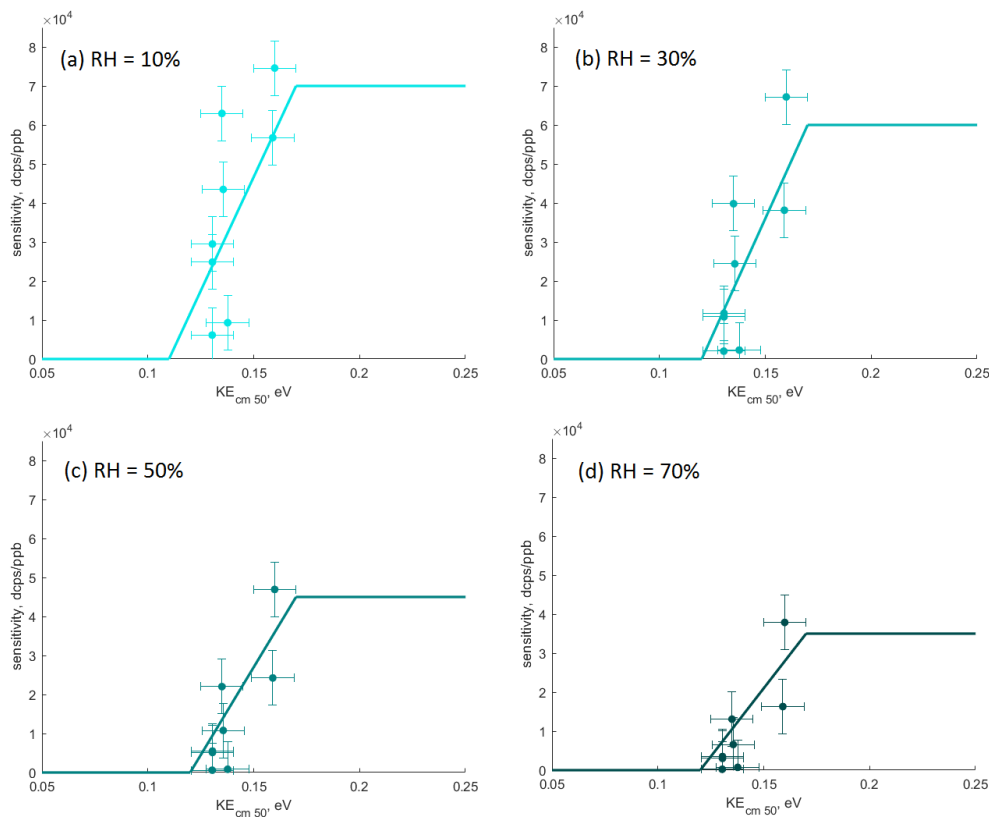

Figure S7: The relationship between calculated kinetic energy of the ammonium-organic clusters  $\text{KE}_{\text{cm } 50}$  and measured sensitivity to calibrated compounds obtained at different RH of the sampled air.

4. *It is not clear how the reaction time in the reaction chamber was determined based on the sensitivities observed in  $\text{H}_3\text{O}^+$  mode. An elaboration about this should be included in the manuscript.*

We modify the description of the method of calculating the kinetic sensitivity and include the following description of the procedure used to estimate the reaction time in the reaction chamber (P6 L31):

“We calculate this limit by using experimentally-determined pressure and reaction time in the reaction chamber, and kinetic limit of ion-molecule reaction rate. We estimate the reaction time in the reaction chamber using the instrument sensitivity to specific compounds in the H<sub>3</sub>O<sup>+</sup> mode. For polar compounds with proton affinity much higher than of water (i.e., acetone), we can assume that reverse proton transfer reactions do not occur. In this case, the instrument sensitivity to those compounds is given by (Lindinger et al., 1997):

$$\frac{i(\text{RH}^+)}{[\text{R}]} = i_{\text{primary}} \cdot k \cdot t_{\text{react}} \cdot \frac{p_{\text{react}}}{1013 \text{ mbar}} \quad (9)$$

where  $\frac{i(\text{RH}^+)}{[\text{R}]}$  is the component sensitivity,  $i_{\text{primary}}$  is the primary ion current,  $k$  is the rate constant for the proton-transfer reaction (e.g.,  $k=3.6 \cdot 10^{-9} \text{ cm}^3 \text{ s}^{-1}$  for acetone, Cappellin et al., 2012),  $t_{\text{react}}$  and  $p_{\text{react}}$  are the reaction time and pressure in the reaction chamber, respectively. By measuring the instrument sensitivity to acetone in the H<sub>3</sub>O<sup>+</sup> mode, we estimate  $t_{\text{react}}$  to be 3 ms.”

5. ***P7, L2-4. Again, is there a RH dependence of the kinetic sensitivity or the maximum sensitivity of NH<sub>4</sub><sup>+</sup>-CIMS?***

We include the following discussion of the dependence of the relationship between KE<sub>cm 50</sub> and sensitivity on RH (P7 L4):

“As shown in Fig. 2, the sensitivity of NH<sub>4</sub><sup>+</sup>-CIMS to many calibrated compounds is RH dependent, thus we observe that the relationship between the calibrated kinetic energy KE<sub>cm 50</sub> and measured sensitivity also depends on the humidity of the sampled air (Fig. S7). Therefore, the values of the collisional limit and other calculated sensitivities reported herein are unique to the instrument setup (i.e., pressures and voltages in the reaction chamber) and to the humidity of the sampled air.”

6. ***P7, L20. Can the sensitivity of H<sub>3</sub>O<sup>+</sup> reagent ions to acetone represent the sensitivities to other OVOCs? Did the authors make any measurements and comparisons of sensitivities in H<sub>3</sub>O<sup>+</sup> mode for different calibration compounds as listed in Table 1?***

We include to the following discussion about the instrument sensitivity in the H<sub>3</sub>O<sup>+</sup> mode (P7 L20):

“Breitenlechner et al. (2017) showed that due to the enhanced reaction time and the increased pressure in the reaction chamber the equilibrium between the forward and reverse proton reactions can be achieved. Hence, many compounds require careful calibration over a broad humidity range. Since PTR3 has the highest detected sensitivity to ketones, we use the acetone sensitivity to calculate the lower limit concentration of OVOCs.”

7. ***P7, L24-26. Similar or relevant observations about the sensitivity and selectivity of NH<sub>4</sub><sup>+</sup> and H<sub>3</sub>O<sup>+</sup> reagent ions have been reported in previous studies. For example, Aljawhary et al. (2013) showed that (H<sub>2</sub>O)<sub>n</sub>H<sup>+</sup> reagent ions are more selective to organic compounds with lower oxygen content. Zhao et al. (2017) showed that NH<sub>4</sub><sup>+</sup> reagent ions are sensitive to a wide range of oxidized organic compounds including highly oxygenated and higher molecular weight***

***molecules formed from ozonolysis of alpha-pinene. The findings in these studies should be discussed in relation to the current work.***

The following discussion is included in the manuscript (P7 L28):

“Similar observations about the selectivity of  $\text{NH}_4^+$ -CIMS and PTR-MS have been reported in the previous studies. Aljawhary et al. (2013) showed that  $\text{H}_3\text{O}^+(\text{H}_2\text{O})_n$  primary ions are more selective to the detection of less oxidized water-soluble organic compounds (WSOC) extracted from alpha-pinene SOA comparing to acetate  $\text{CH}_3\text{C}(\text{O})\text{O}^-$  and iodide water clusters  $\text{I}^-(\text{H}_2\text{O})_n$  used as primary ions. Zhao et al. (2017) demonstrated that multiple positive reagent ions ( $\text{NH}_4^+$ ,  $\text{Li}^+$ ,  $\text{Na}^+$ ,  $\text{K}^+$ ) have higher selectivity to a wide range of highly oxygenated organics with higher molecular weights formed from ozonolysis of alpha-pinene, while negative reagent ions ( $\text{I}^-$  and  $\text{NO}_3^-$ ) are more selective towards smaller species (e.g.,  $\text{CH}_2\text{O}_2$ ,  $\text{CH}_2\text{O}_3$ ,  $\text{C}_2\text{H}_2\text{O}_3$ , and  $\text{C}_2\text{H}_4\text{O}_3$ ).”

8. ***P8, L7. Since the authors never discuss the third ion source in the manuscript, I would suggest removing the statement “the instrument is equipped with three corona discharge ion sources”.***

We change the sentence as suggested (P8 L7):

“The instrument can be operated in both  $\text{NH}_4^+$  and  $\text{H}_3\text{O}^+$  modes as  $\text{NH}_4^+$ -CIMS and PTR-MS, respectively, while switching between the two modes can be done within two minutes.”

9. ***Table 1. The detection limit is usually defined as the concentration that gives rise to a signal of 3 sigma. I wonder why the authors use 2 sigma.***

We replace  $2\sigma$ -LOD by  $3\sigma$ -LOD in Table 1:

| Species          | Ion formula                                   | m/z      | Sensitivity |            | $3\sigma$ -LOD<br>[pptv] (1s) | $V_{50}$ [V] | $\text{KE}_{\text{cm } 50}$<br>[eV] |
|------------------|-----------------------------------------------|----------|-------------|------------|-------------------------------|--------------|-------------------------------------|
|                  |                                               |          | [cps/ppb]   | [dcps/ppb] |                               |              |                                     |
| methanol         | $\text{CH}_4\text{ONH}_4^+$                   | 50.06    | 59          | 83         | 93                            | 27.8         | 0.091                               |
| acetonitrile     | $\text{C}_2\text{H}_3\text{NNH}_4^+$          | 59.0604  | 9700        | 12600      | 9                             | 34.5         | 0.120                               |
| acetone          | $\text{C}_3\text{H}_6\text{ONH}_4^+$          | 76.0757  | 21400       | 24600      | 2.75                          | 36.4         | 0.129                               |
| acetic acid      | $\text{C}_2\text{H}_4\text{O}_2\text{NH}_4^+$ | 78.055   | 1890        | 2140       | 99                            | 31.4         | 0.105                               |
| isopropanol      | $\text{C}_3\text{H}_8\text{ONH}_4^+$          | 78.0913  | 1100        | 1240       | 23                            | 36.5         | 0.131                               |
| MVK              | $\text{C}_4\text{H}_6\text{ONH}_4^+$          | 88.0757  | 27900       | 29700      | 20                            | 36.9         | 0.131                               |
| MEK              | $\text{C}_4\text{H}_8\text{ONH}_4^+$          | 90.0913  | 39300       | 41400      | 8                             | 37.8         | 0.136                               |
| hydroxyacetone   | $\text{C}_3\text{H}_6\text{O}_2\text{NH}_4^+$ | 92.0706  | 17600       | 18300      | 14                            | 35.8         | 0.126                               |
| furanone         | $\text{C}_4\text{H}_4\text{O}_2\text{NH}_4^+$ | 102.055  | 64000       | 63400      | 57                            | 40.3         | 0.149                               |
| biacetyl         | $\text{C}_4\text{H}_6\text{O}_2\text{NH}_4^+$ | 104.0706 | 3490        | 3420       | 35                            | 36.6         | 0.130                               |
| pyruvic acid     | $\text{C}_3\text{H}_4\text{O}_3\text{NH}_4^+$ | 106.0499 | 1650        | 1600       | 53                            | 34.8         | 0.122                               |
| angelica lactone | $\text{C}_5\text{H}_6\text{O}_2\text{NH}_4^+$ | 116.0706 | 65500       | 60800      | 0.86                          | 39.6         | 0.145                               |
| hexanone         | $\text{C}_6\text{H}_{12}\text{ONH}_4^+$       | 118.1226 | 59000       | 54300      | 8                             | 41.5         | 0.155                               |
| benzaldehyde     | $\text{C}_7\text{H}_6\text{ONH}_4^+$          | 124.0757 | 43200       | 38800      | 2.03                          | 36.7         | 0.130                               |
| heptanol         | $\text{C}_7\text{H}_{16}\text{ONH}_4^+$       | 134.1539 | 12150       | 10500      | 2.28                          | 39.5         | 0.144                               |
| decanone         | $\text{C}_{10}\text{H}_{20}\text{ONH}_4^+$    | 174.1852 | 89400       | 67800      | 2.49                          | 47.1         | 0.189                               |

Table 1: Sensitivities and detection limits of  $\text{NH}_4^+$ -CIMS for various VOC species; voltage ( $V_{50}$ ) and corresponding kinetic energy ( $\text{KE}_{\text{cm } 50}$ ) at which half of the ions have dissociated.

**References:**

Cappellin, L., Karl, T., Probst, M., Ismailova, O., Winkler, P. M., Soukoulis, C., Aprea, E., Märk, T.D., Gasperi, F., Biasoli, F.: On Quantitative Determination of Volatile Organic Compound Concentrations Using Proton Transfer Reaction Time-of-Flight Mass Spectrometry, *Environ. Sci. Technol.*, 46 (4), 2283–2290, doi: 10.1021/es203985t, 2012
